# Supplementary material
Source: PubMed Central journal article supplement (PMC4030681)

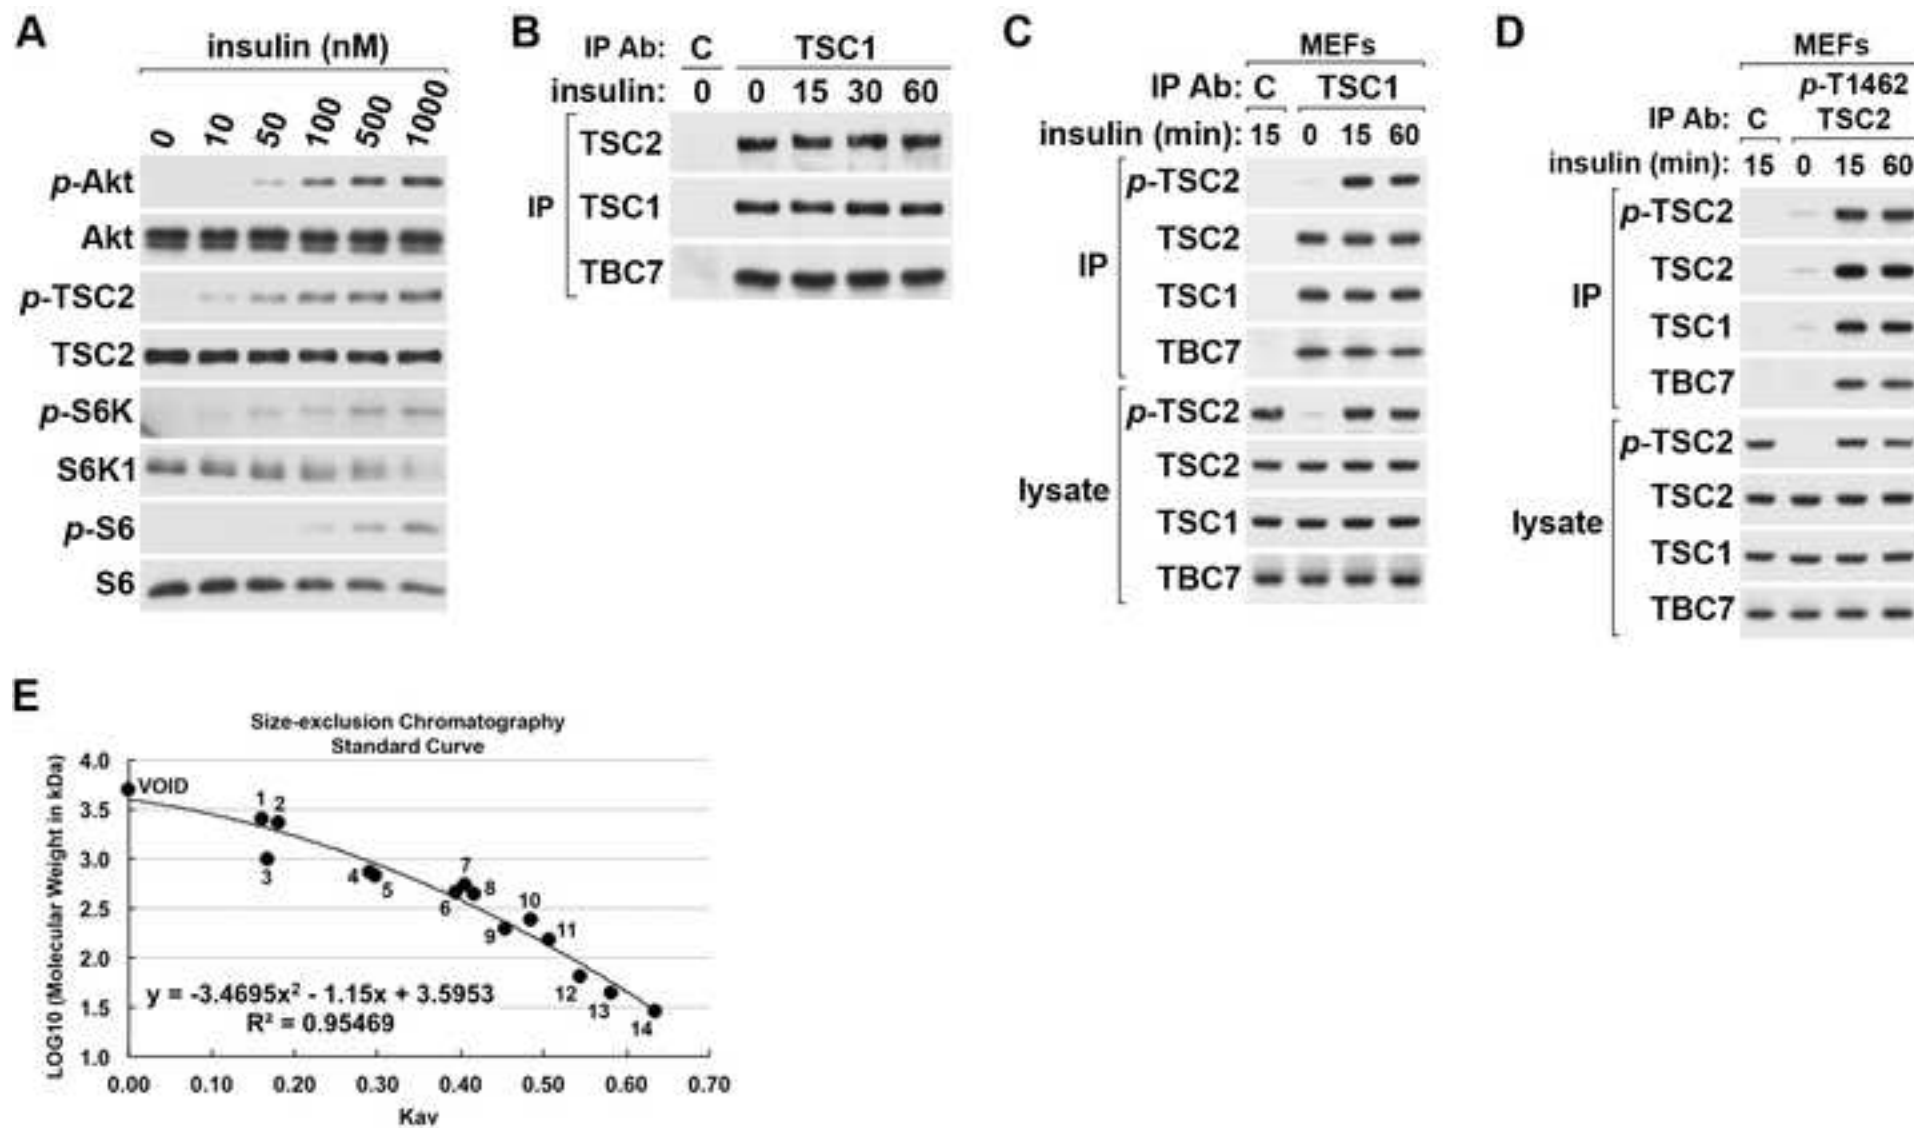

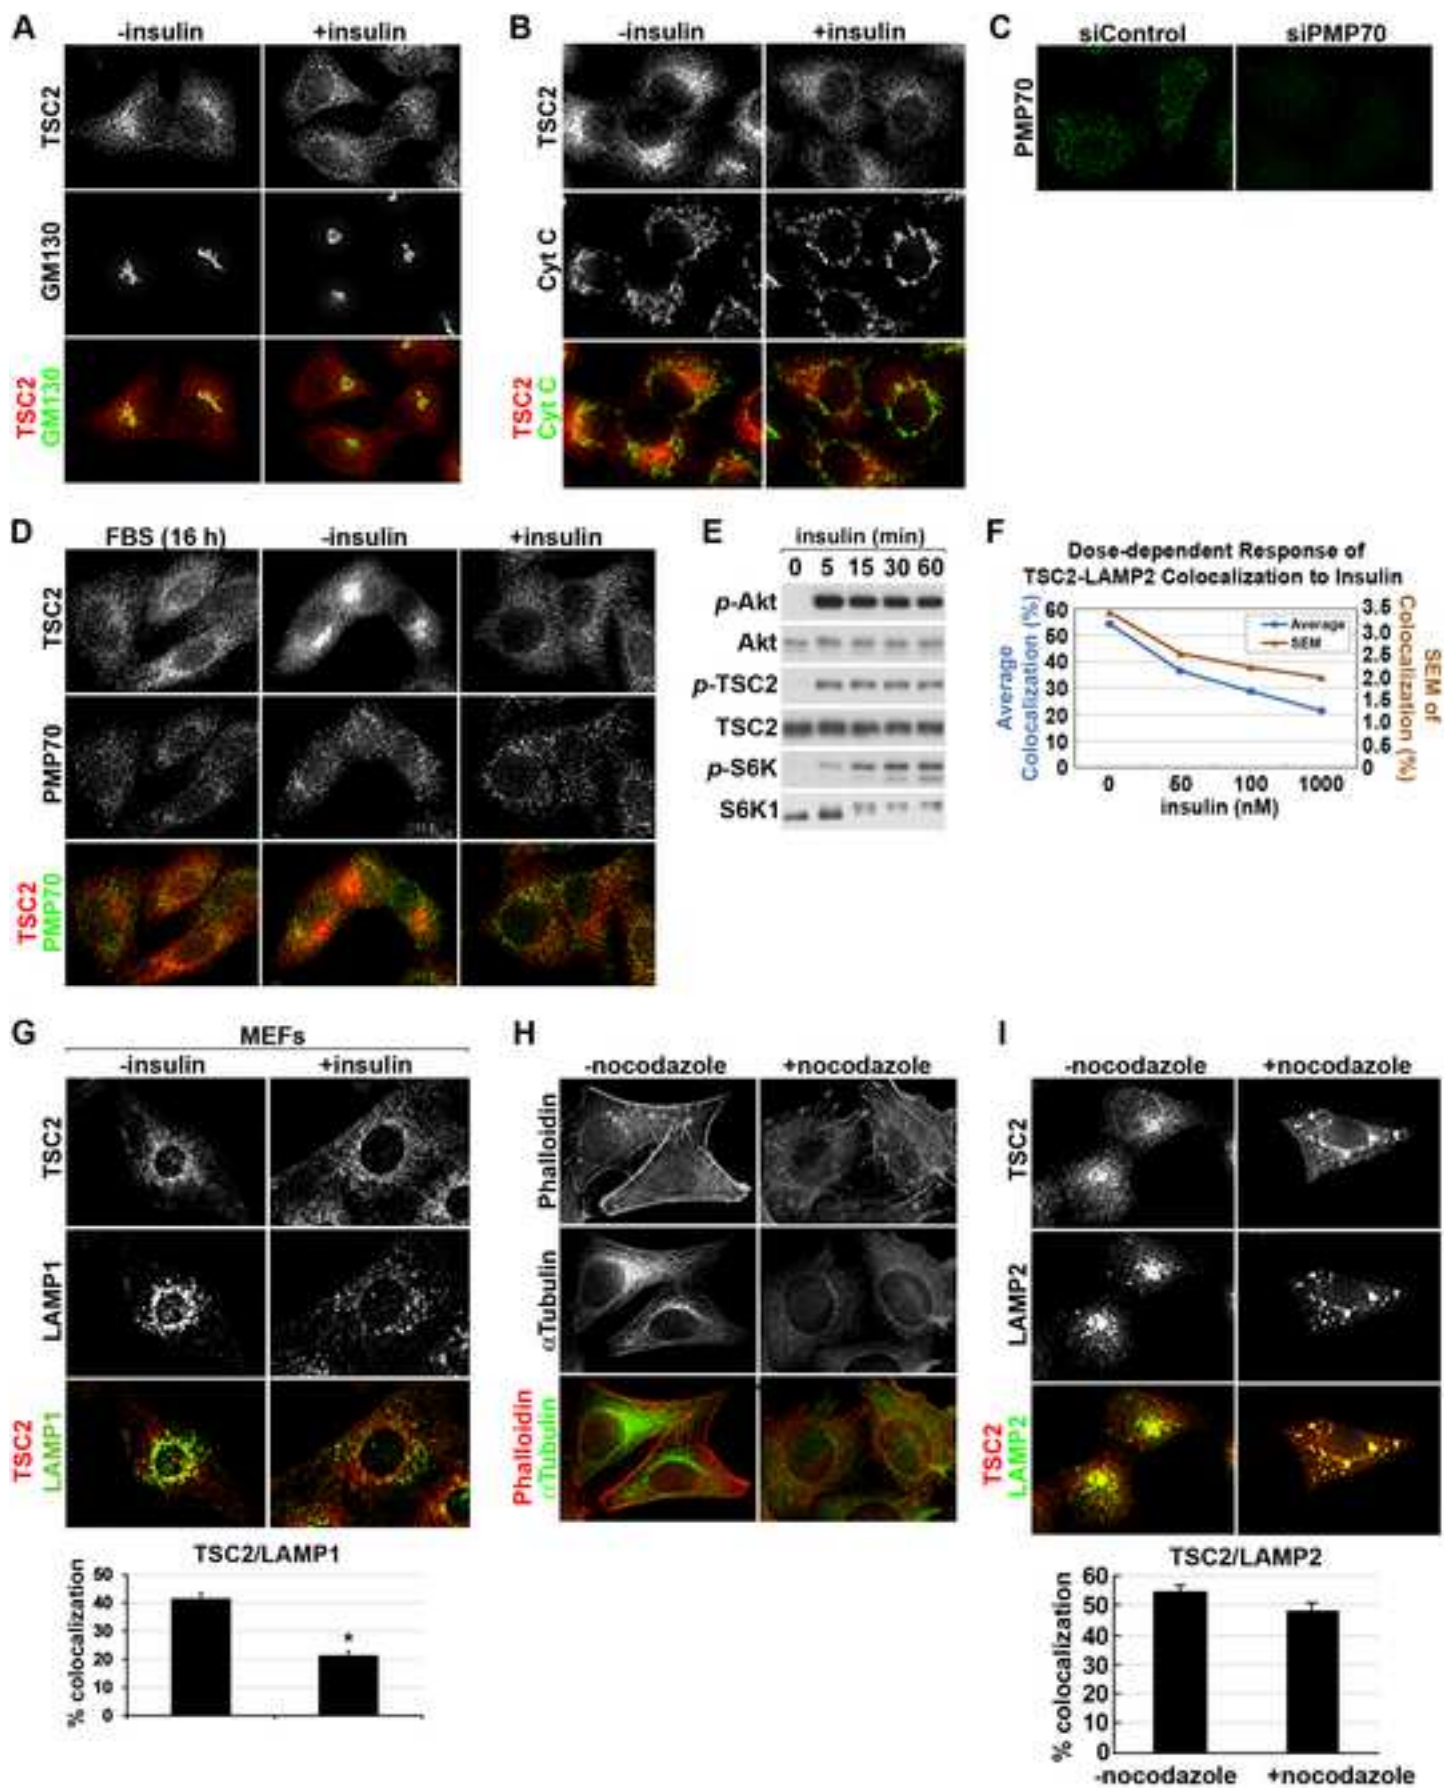

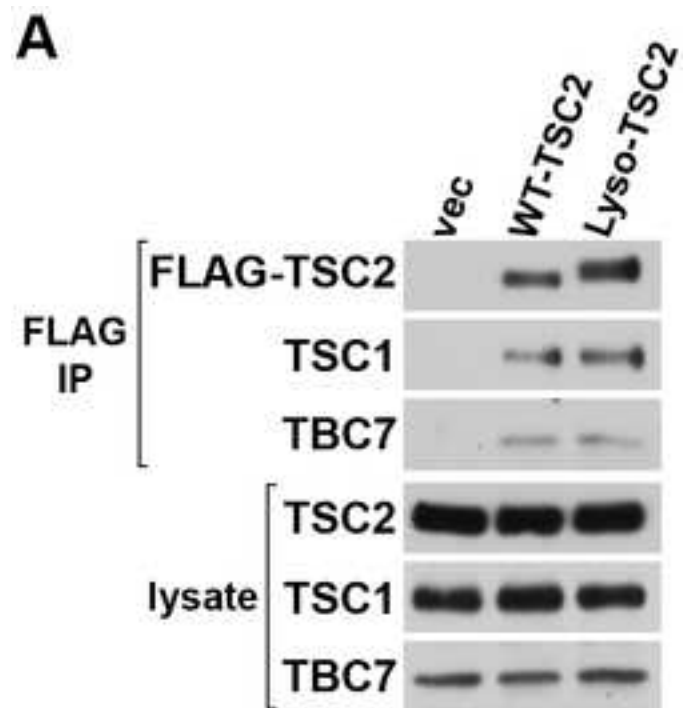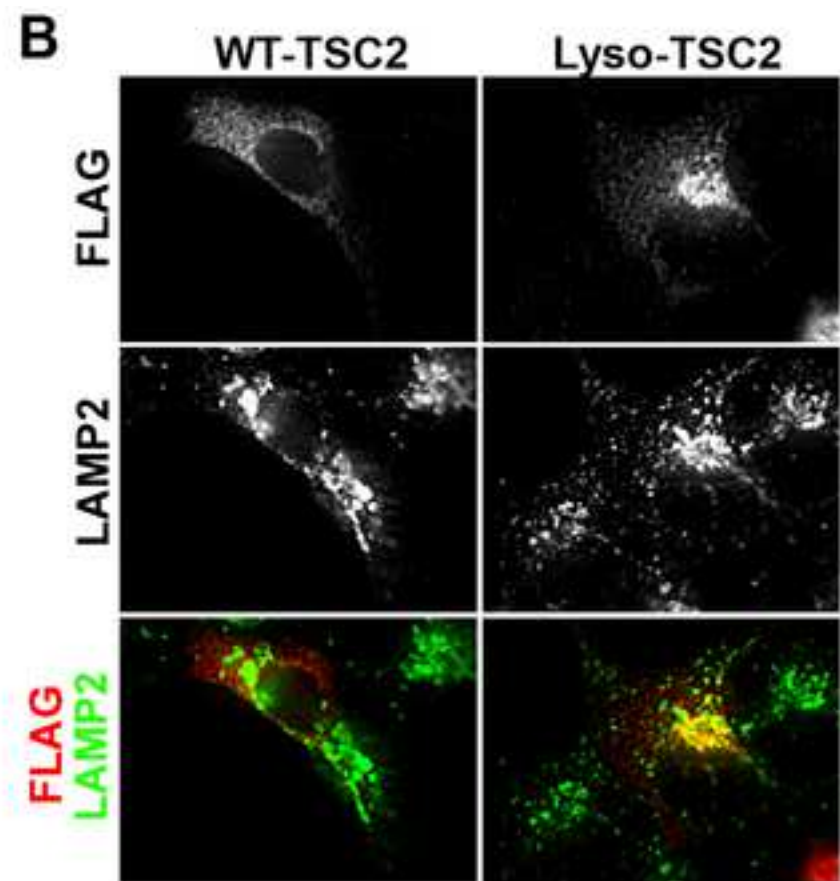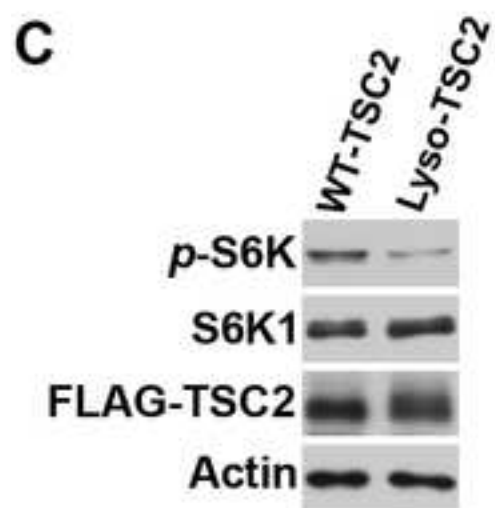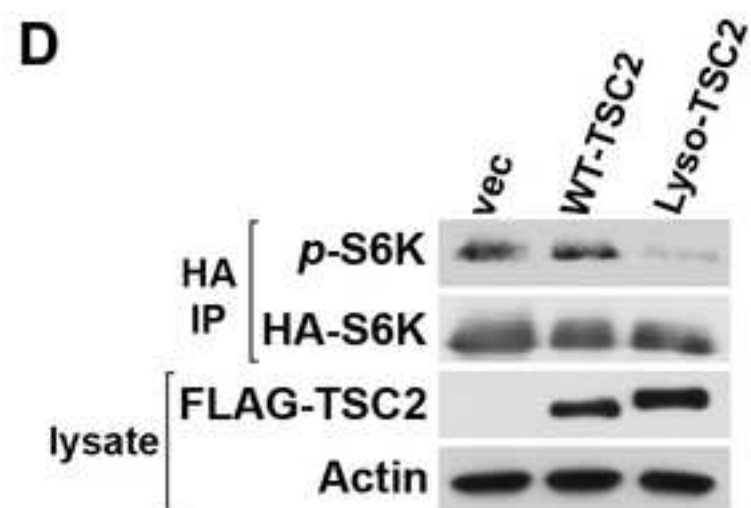

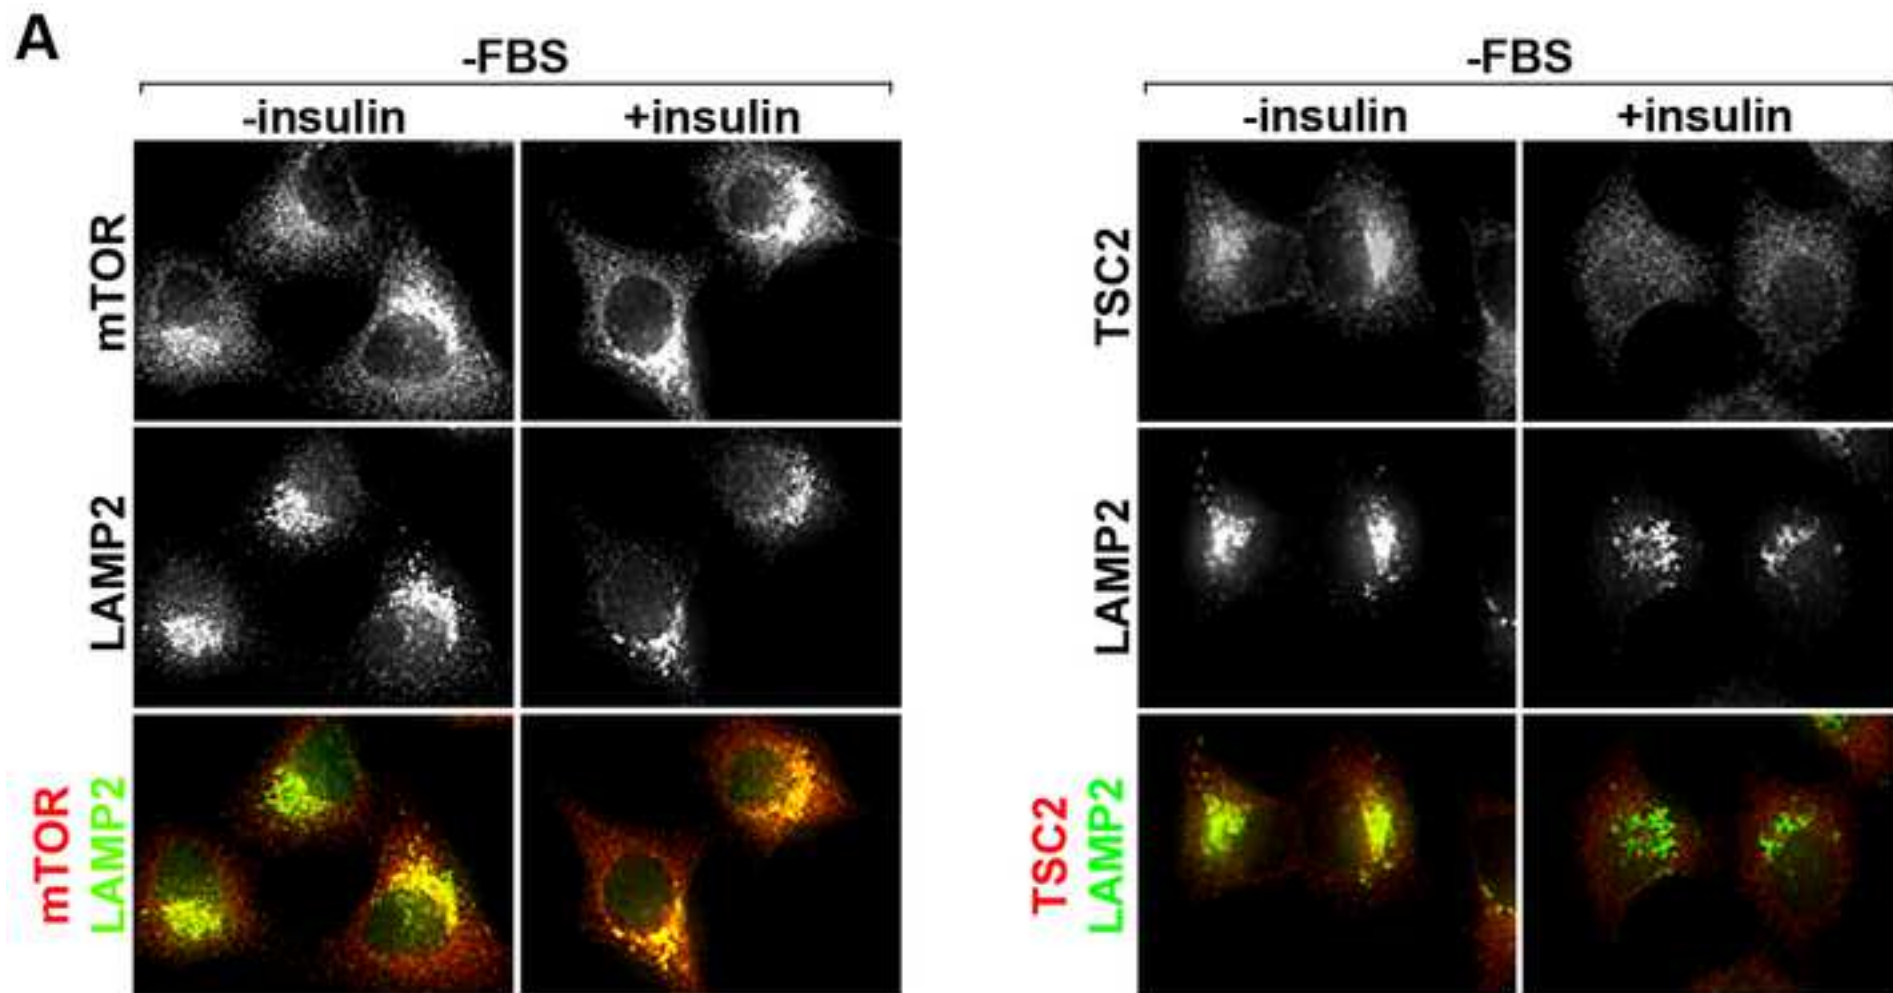

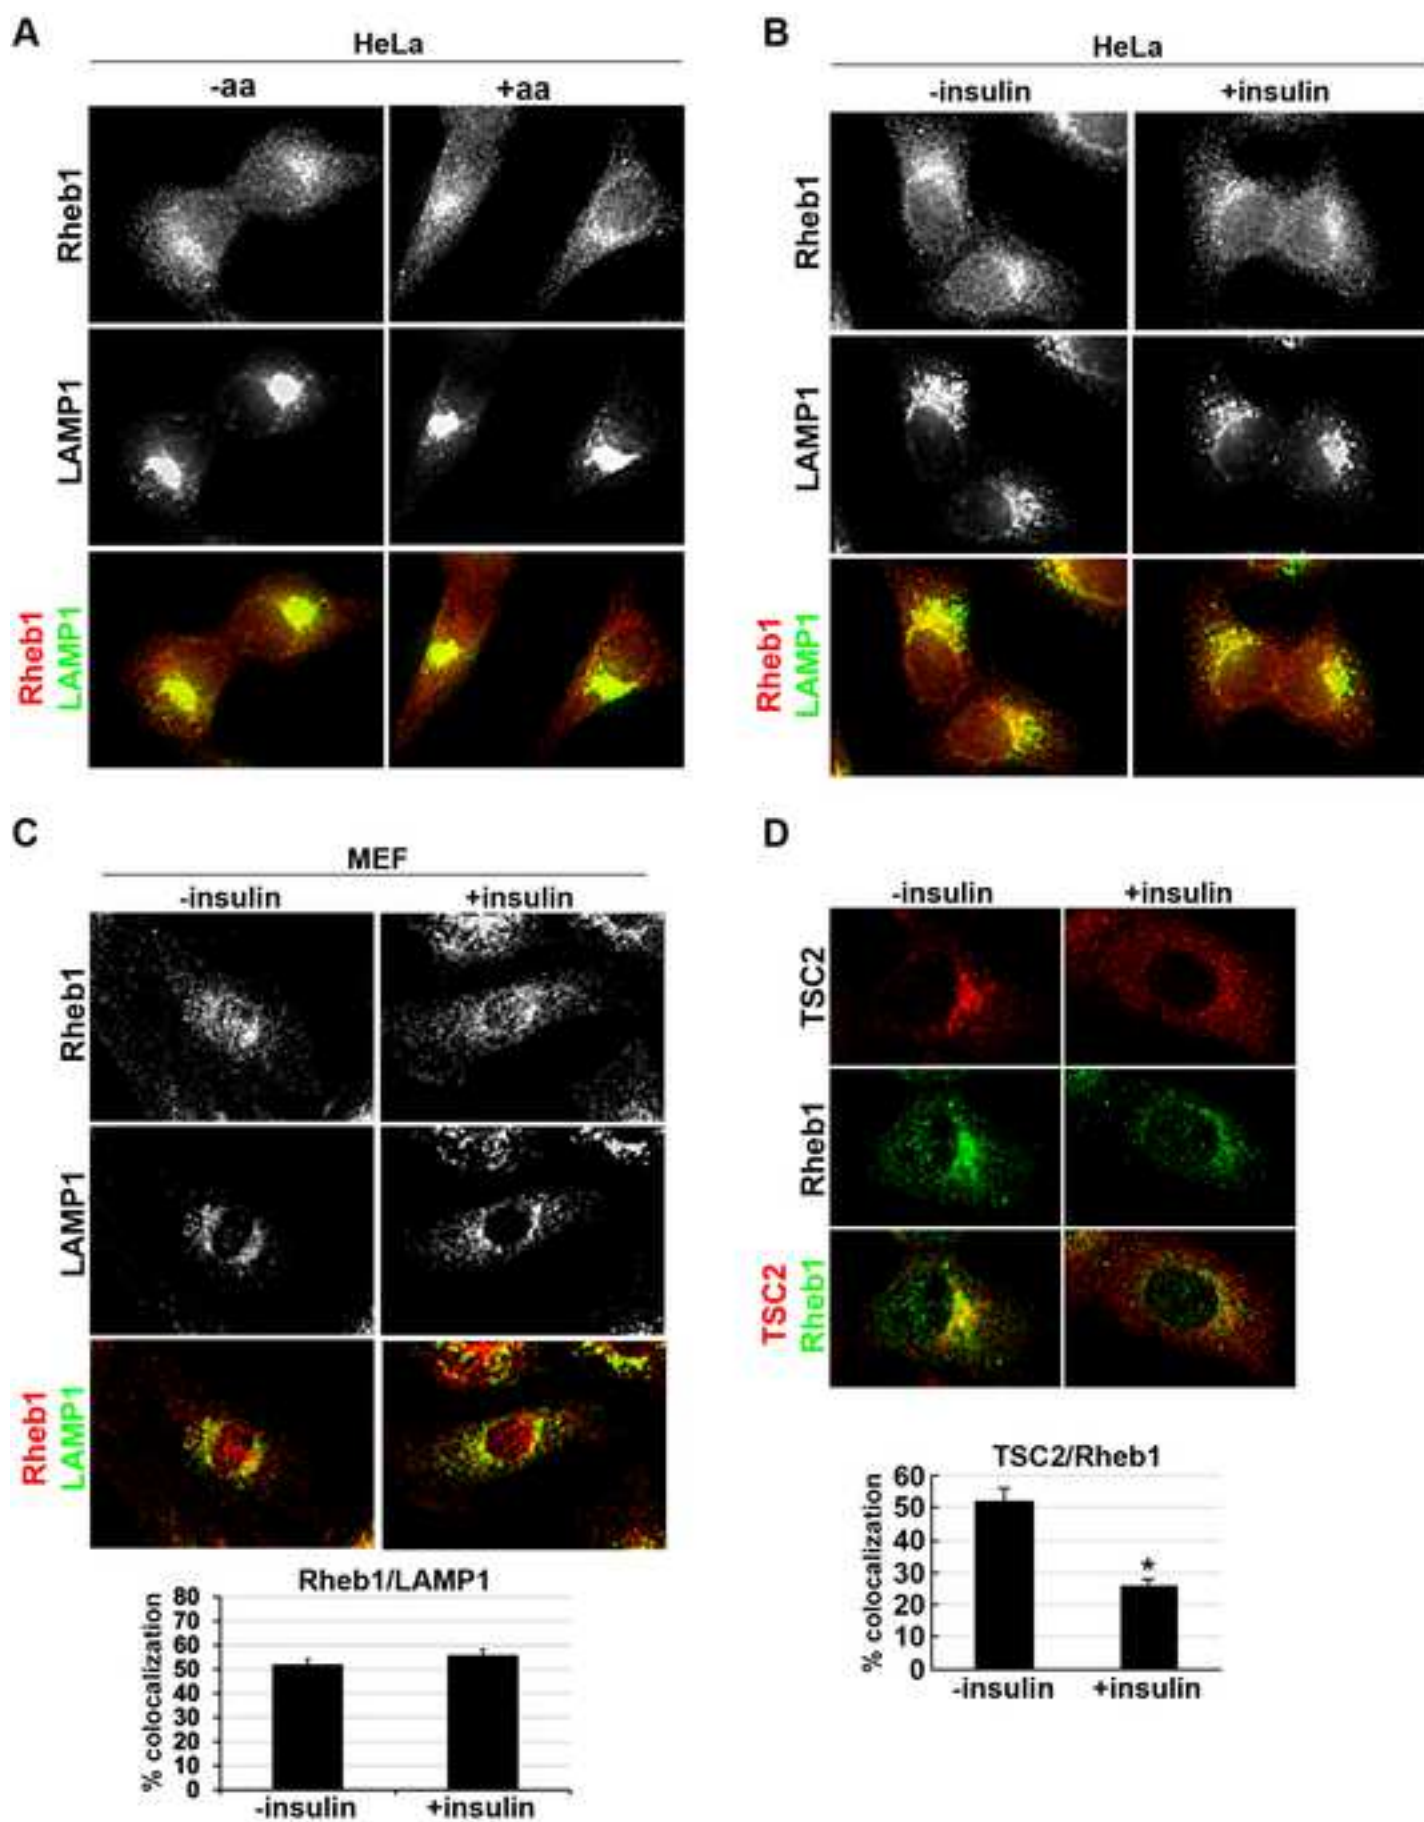

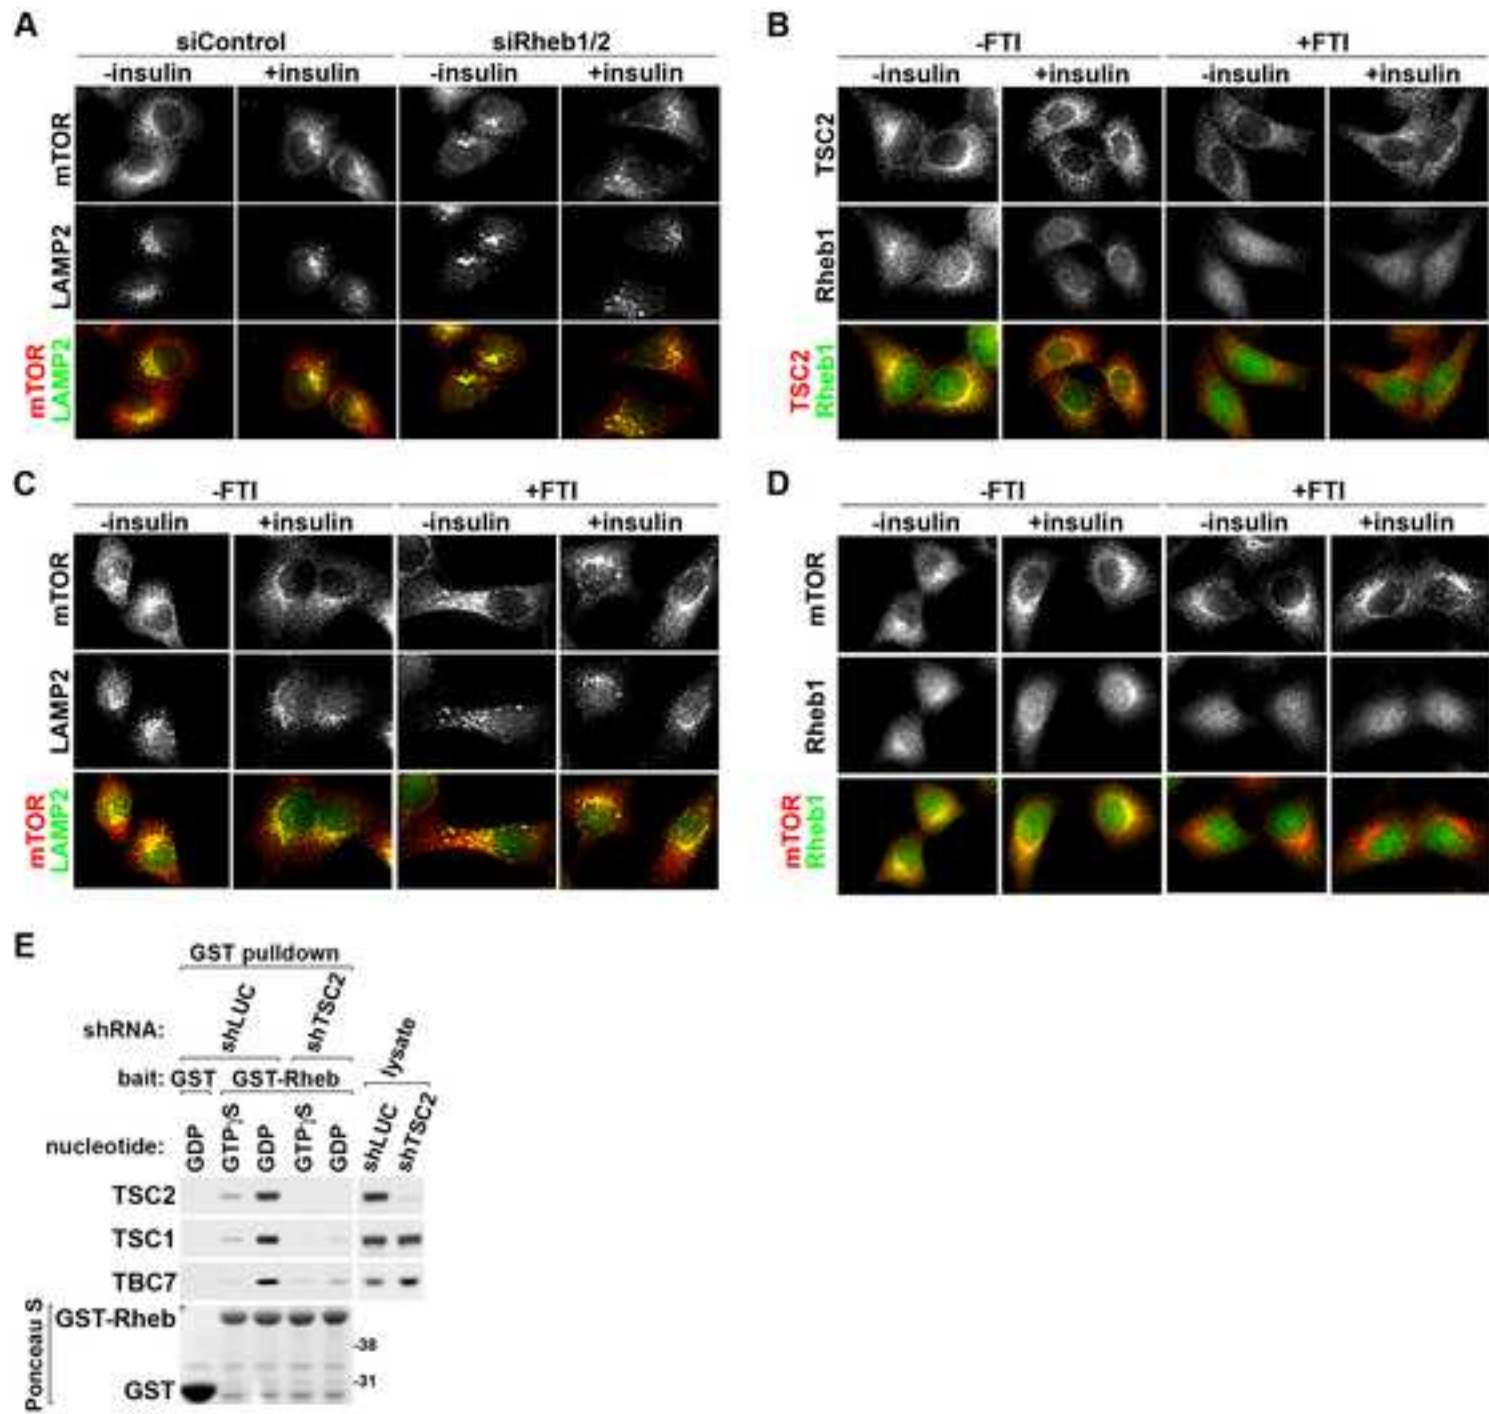

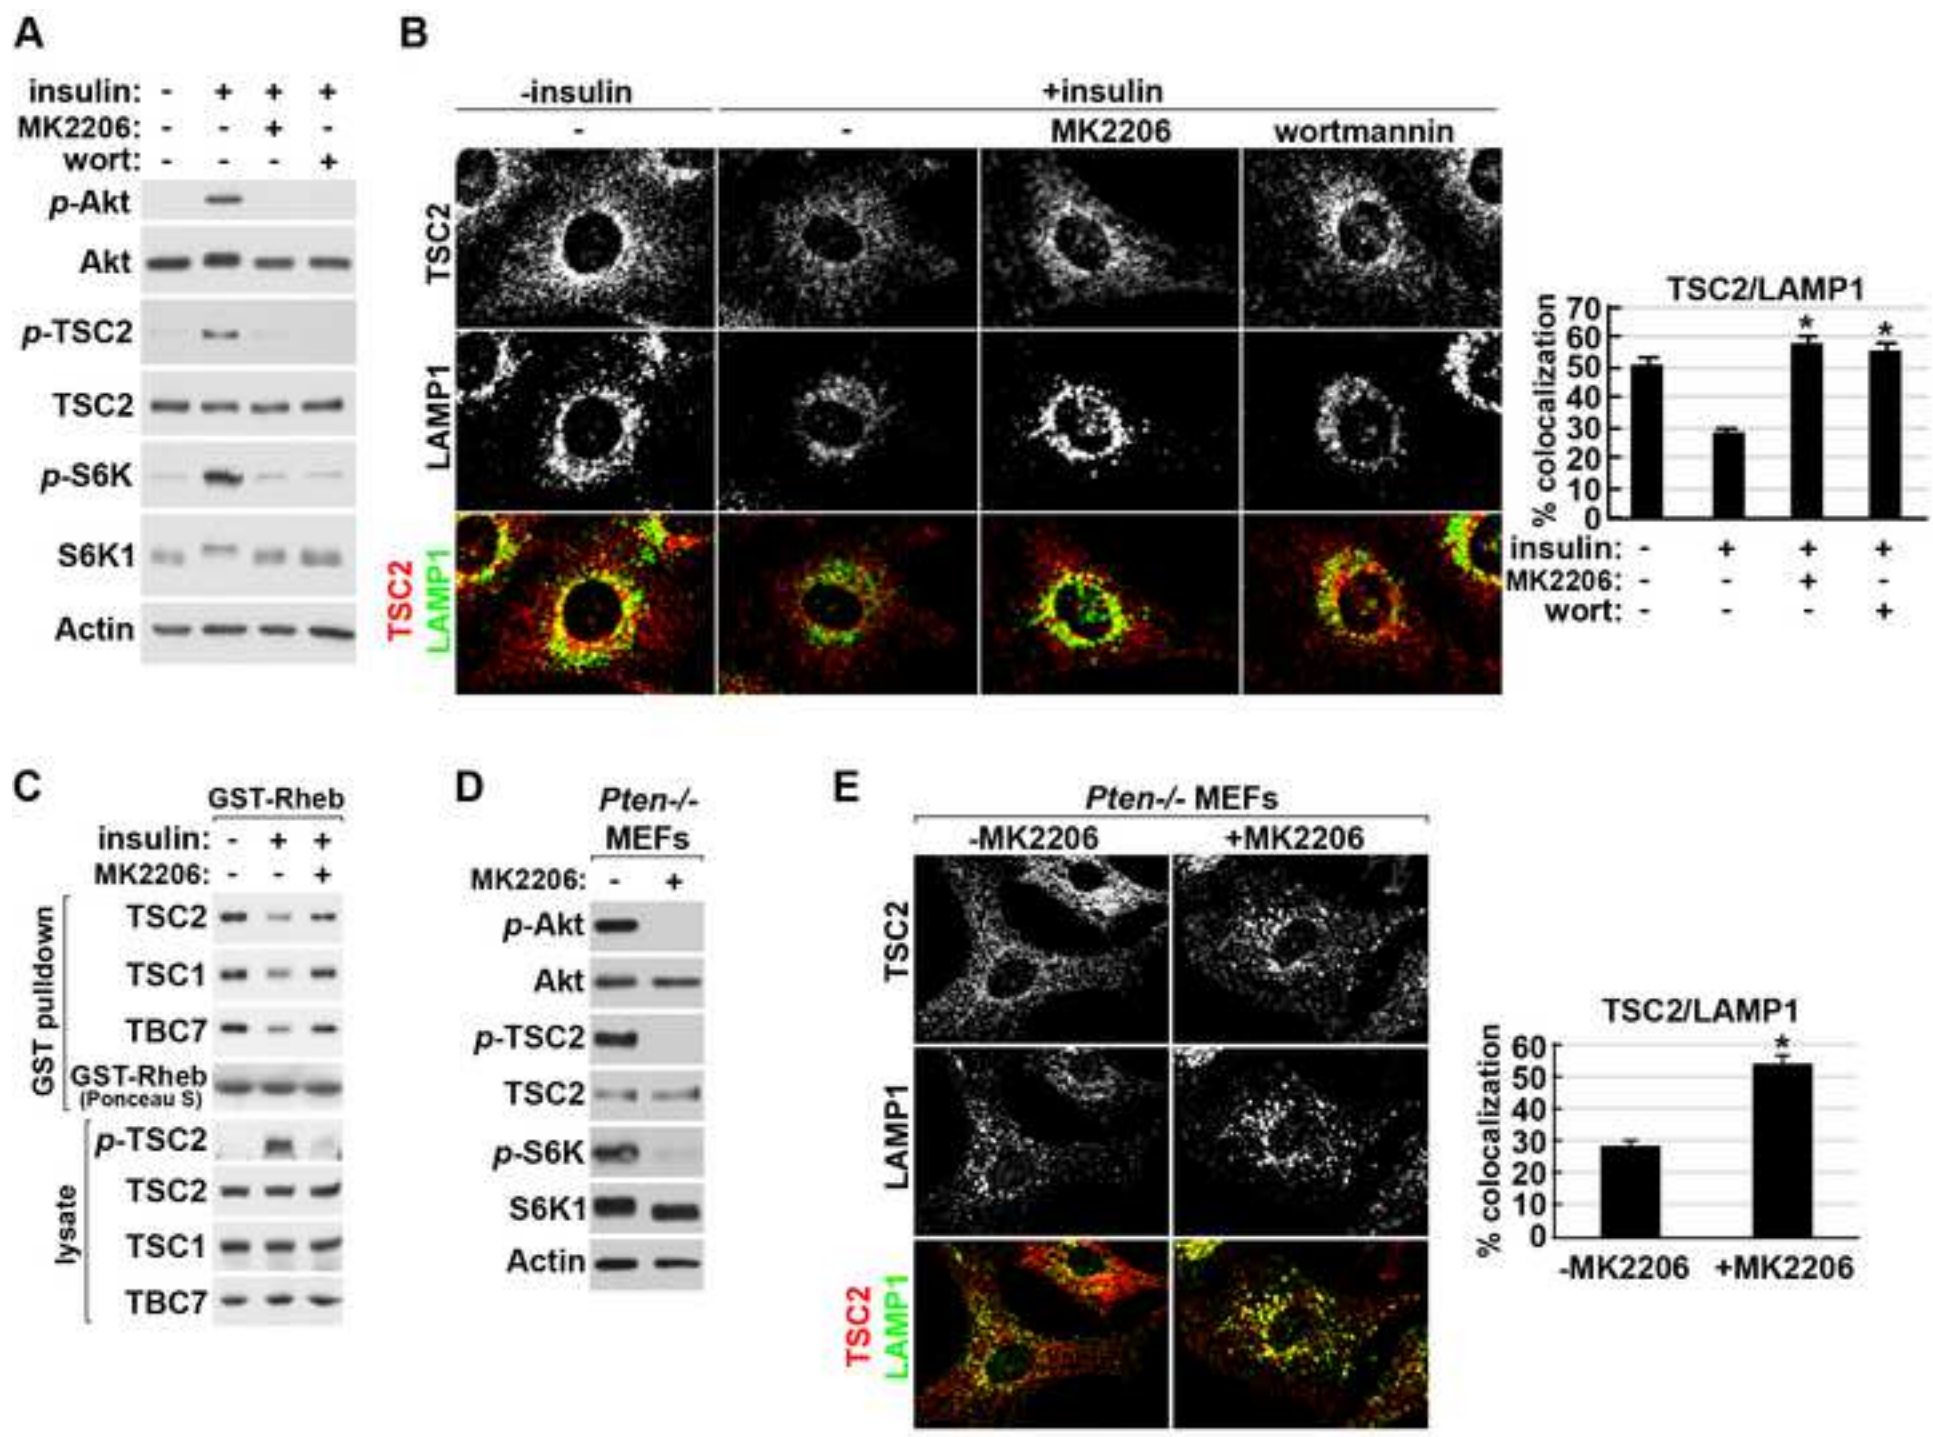

Supplement: NIHMS555064-supplement-02.pdf [file NIHMS555064-supplement-02.pdf]
